**Bulletin of Mathematical Biology manuscript No.**  
(will be inserted by the editor)

---

## A Bayesian computational approach to explore the optimal duration of a cell proliferation assay.

Alexander P Browning · Scott W  
McCue · Matthew J Simpson

Received: date / Accepted: date

**Abstract** Cell proliferation assays are routinely used to explore how a low density monolayer of cells grows with time. For a typical cell line with a doubling time of 12 hours (or longer), a standard cell proliferation assay conducted over 24 hours provides excellent information about the low-density exponential growth rate, but limited information about crowding effects that occur at higher densities. To explore how we can best detect and quantify crowding effects, we present a suite of *in silico* proliferation assays where cells proliferate according to a generalised logistic growth model. Using approximate Bayesian computation we show that data from a standard cell proliferation assay cannot reliably distinguish between classical logistic growth and more general non-logistic growth models. We then explore, and quantify, the trade-off between increasing the duration of the experiment and the associated decrease in uncertainty in the crowding mechanism.

**Keywords** Logistic growth; Generalised logistic growth; Approximate Bayesian computation; Cell proliferation assay; Experimental design.

---

School of Mathematical Sciences, Queensland University of Technology (QUT), Brisbane, Australia E-mail: [matthew.simpson@qut.edu.au](mailto:matthew.simpson@qut.edu.au)

## 1 Introduction

Two-dimensional *in vitro* cell biology experiments play an invaluable role in improving our understanding of the collective behaviour of cell populations (Laing, 2007). Understanding collective cell behaviour is relevant to a number of normal and pathological processes, such as tissue regeneration and malignant spreading, respectively. One of the most common *in vitro* cell biology experiments is called a *proliferation assay* (Bosco et al., 2015; Bourseguin et al., 2016). Cell proliferation assays are initiated by uniformly placing a monolayer of cells, at low density, on a two-dimensional substrate. Individual cells in the population undergo both movement and proliferation events, and the assay is observed as the density of the monolayer of cells increases. Comparing cell proliferation assays with and without a putative drug plays an important role in drug design (Bosco et al., 2015; Bourseguin et al., 2016).

One approach to interpret a cell proliferation assay is to use a mathematical model. This approach can provide quantitative insight into the mechanisms involved (Maini et al., 2004; Sengers et al., 2007). For example, it is possible to estimate the proliferation rate of cells by calibrating a mathematical model to data from a cell proliferation assay. Results can then be used to compare a target and control assay (Johnston et al., 2015). Typically, most previous studies that interpret cell biology assays using continuum mathematical models make the assumption that cells proliferate logistically (Cai et al. 2007; Dale et al., 1994; Doran et al., 2009; Jin et al., 2016a; Maini et al., 2004a; Maini et al., 2004b; O’Dea et al., 2012; Savla et al., 2004; Sengers et al., 2007; Sheardown and Cheng, 1996; Sherratt and Murray, 1990). The classical logistic equation is given by

$$\frac{dC(t)}{dt} = \lambda C(t)(1 - C(t)), \quad (1)$$

where  $C(t)$  is the scaled cell density, such that  $C(t) = 1$  represents the carrying capacity density,  $t$  is time and  $\lambda$  is the cell proliferation rate. For example, by calibrating the solution of Eq (??) to data from a cell biology assay, Treloar et al. (2014) showed that the proliferation rate of 3T3 fibroblast cells is approximately 0.048 /hour. However, while the classical logistic model is routinely used to study biological population dynamics (Pearl, 1927; Edelstein-Keshet, 1988; Murray, 2002), this choice is often made without a careful examination of whether the classical logistic model is valid (Treloar et al., 2014).

In the literature, there is an awareness that biological populations do not always grow according to the classical logistic equation (Gerlee, 2013; Zwietering et al., 1990). For example, West and coworkers investigate the growth of cell populations from a wide range of animal models and find that the growth is not logistic; instead, they find that a more general model provides a better match to the experimental data (West et al., 2001). Likewise, Laird (1964) examines tumour growth data and shows that the Gompertz growth law matches the data better than the classical logistic model. Similar observations have also been made more recently for different types of tumour growth by Sarapata and de Pillis (2014).

Therefore, it is not always clear that the classical logistic model ought to be used to describe cell proliferation assays. The classical logistic model, and its generalisations (Tsoularis and Wallace, 2002), all lead to similar growth dynamics during the early phase of the experiment when the density is small. The key differences between these models occur at larger densities as the cell population grows towards the carrying capacity density. The question of whether cells in a proliferation assay grow logistically, or by some other mechanism, is obscured by the fact that most cell proliferation assays are conducted for a relatively short period of time. To illustrate this, we note that a typical cell proliferation rate of  $\lambda = 0.048$  /hour (Treloar et al., 2014) corresponds to a

---

doubling time of approximately 14 hours. Given that a typical initial cell density in a cell proliferation assay is approximately  $C(0) \approx 0.1$ , and the typical time scale of a cell proliferation assay is no more than 24 hours, the cell density will grow to be no more than 0.4, Fig ??(a)-(d). Indeed, the evolution of the cell density data in Fig ??(d) shows that the cell density grows approximately linearly over the standard experimental duration of 24 hours. This linear increase is consistent with the early time behaviour of the exponential growth phase, but provides less information about later time behaviour where crowding effects play a role. Therefore, standard experimental durations are inappropriate for the purposes of examining how cells grow at high densities. The focus of the current work is to explore how we can determine the optimal duration of a cell proliferation assay so that it can be used to reliably distinguish between classical logistic and generalised logistic growth models. In summary, this study is the first time that an individual based model has been used to explore the duration of a cell proliferation assay, in order to reliably distinguish between different types of growth models.

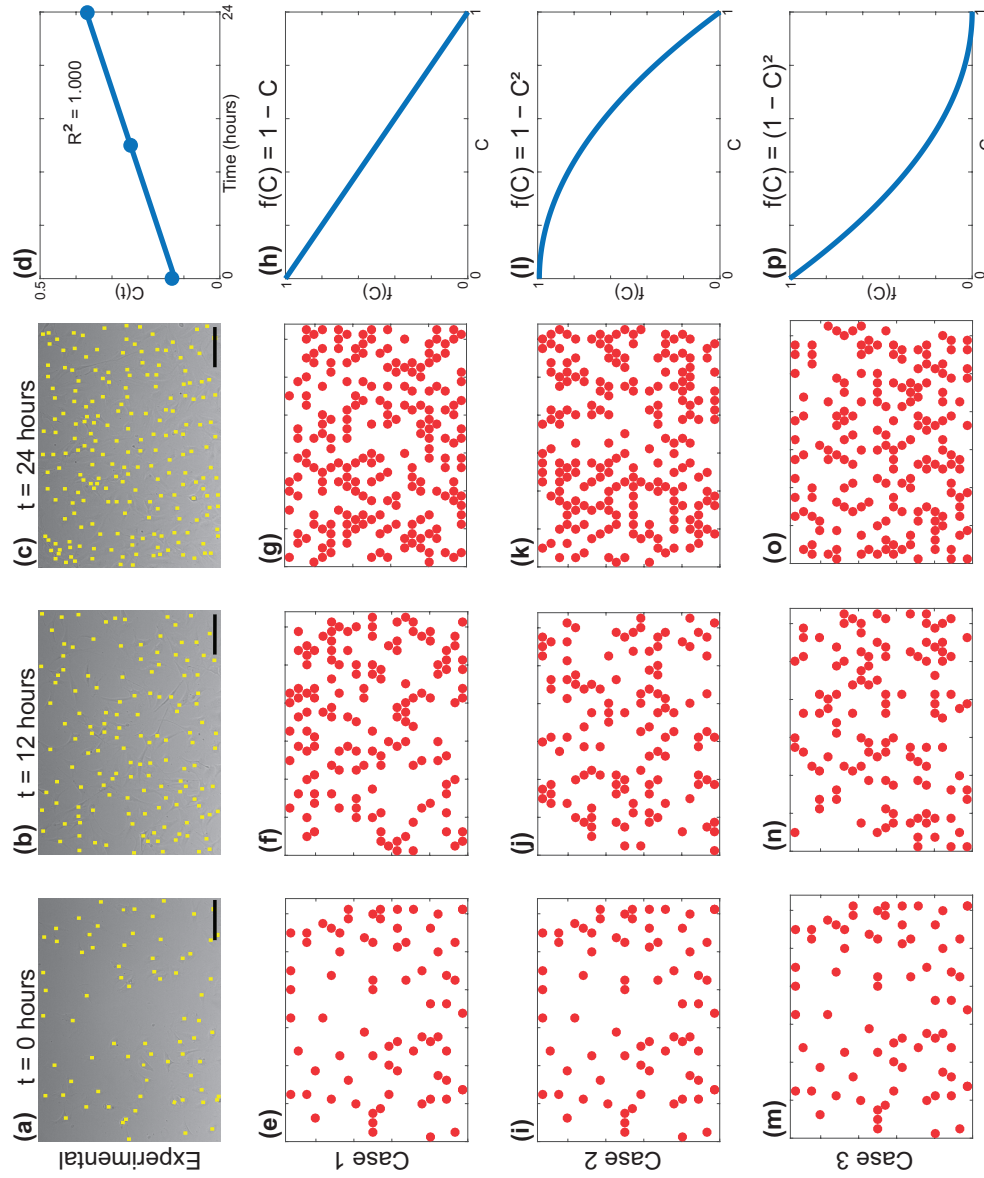

**Fig. 1. Snapshots of experimental and *in silico* cell proliferation assays.** (a)-(c) show experimental images obtained from a typical cell proliferation assay performed using 3T3 fibroblast cells, shown at 12 hour intervals, as indicated. The position of each cell is identified with a yellow marker. Each scale bar corresponds to  $100 \mu\text{m}$ . (d) shows the scaled cell density from this experiment at each time point, and a least squares linear fit. (e),(i) and (m) show the initial distribution of agents in the *in silico* assays. The location of agents in (e),(i) and (m) are identical, and chosen so that the location of each cell in (a) is mapped to a hexagonal lattice, and placed on the nearest vacant lattice site. Simulation results are shown for: Case 1 in (e)-(g); Case 2 in (i)-(k); and, Case 3 in (m)-(o). The crowding function used in each Case is shown (h),(l) and (p) for Cases 1, 2 and 3 respectively. All simulations correspond to  $I = 25$ ,  $J = 22$ ,  $P_m = 0.579$ ,  $P_p = 0.002$ ,  $\tau = 0.0417$  hour and  $\Delta = 25 \mu\text{m}$ . These discrete parameters correspond to  $\lambda = 0.048$  /hour and  $D = 2200 \mu\text{m}^2$  /hour. Images in (a)-(c) are reprinted with permission from the Bulletin of Mathematical Biology (2013) Simpson et al. Experimental and modelling investigation of monolayer development with clustering. 75, 871-889.

This work is organised as follows. We first present a suite of results from a stochastic *in silico* cell proliferation assay. The benefit of working with an *in silico* assay is that it can be used to describe the evolution of a cell proliferation assay corresponding to a known, but general, proliferation mechanism,

$$\frac{dC(t)}{dt} = \lambda C(t)f(C), \quad (2)$$

where  $f(C) \in [0, 1]$  is a crowding function of our choice (Jin et al., 2016b). The crowding function is a smooth decreasing function that satisfies  $f(0) = 1$  and  $f(1) = 0$ . In general, we could study any choice of  $f(C)$  that satisfies these conditions. However, for the purposes of this study we restrict our attention to the family of crowding functions given by

$$f(C) = (1 - C^\alpha)^\beta, \quad (3)$$

where  $\alpha$  and  $\beta$  are positive constants (Tsoularis and Wallace, 2002). This choice of  $f(C)$  is still general and we note that different choices of  $\alpha$  and  $\beta$  correspond to well-known biological growth models such as the classical logistic growth model, the Gompertz growth model, and the von Bertalanffy growth model (Tsoularis and Wallace, 2002). Our choice of  $f(C)$  is partly motivated by the recent work of Sarapata and de Pillis (2014), who explore a range of sigmoid growth models for different types of tumours, including bladder, breast, liver, lung, and melanoma tumours. Sarapata and de Pillis (2014) show that the classical logistic growth model does not always provide the best match to observed data, and they test a range of other sigmoid growth models for each different kind of tumour. The different forms of sigmoid growth models that Sarapata and de Pillis (2014) explore are encompassed in our choice of crowding function, Eq ??, simply by making different choices of the constants  $\alpha$  and  $\beta$ .

In this work we focus on three particular choices of  $f(C)$ :

Case 1:  $\alpha = 1$  and  $\beta = 1$ . Here,  $f(C)$  is a linear function that corresponds to the classical logistic equation (Eq ??). See Fig ??(h);

Case 2:  $\alpha = 2$  and  $\beta = 1$ . Here,  $f(C)$  is a non-linear, concave-down function. See Fig ??(l); and,

Case 3:  $\alpha = 1$  and  $\beta = 2$ . Here,  $f(C)$  is a non-linear, concave-up function. See Fig ??(p).

Setting  $\alpha = 1$  and  $\beta = 1$  recovers the classical logistic equation (Eq ??), whereas other choices of  $\alpha$  and  $\beta$  lead to different, general logistic growth models. Typical *in silico* experiments showing snapshots of the growing populations are given in Fig ??(e)-(g) for Case 1, Fig ??(i)-(k) for Case 2 and Fig ??(m)-(o) for Case 3. After we have generated typical *in silico* results for these different choices of  $f(C)$ , we then examine our ability to distinguish between data corresponding to different choices of  $f(C)$  using approximate Bayesian computation (ABC) (Liepe et al. 2014; Sunnaker et al. 2013; Tanaka et al. 2006; Collis et al. 2017) to estimate the parameters  $\alpha$  and  $\beta$ . This procedure clearly shows that the duration of a standard cell proliferation assay is too short to reliably recover the values of  $\alpha$  and  $\beta$ . Therefore, to provide quantitative insight into the benefit of performing the experiment for a longer duration, we quantify the decrease in our uncertainty of the parameters and the increase in information as we effectively run the experiment for longer periods of time.

## 2 Methods

### 2.1 Discrete mathematical model

We use a lattice-based random walk model to describe a cell proliferation assay (Liggett, 1999). Throughout the work, we will refer to a realisation of the

stochastic model as either an *in silico* experiment, or a simulation. In the model cells are treated as equally-sized discs, and this is a typical assumption (Deroulers et al. 2009; Vo et al. 2015) that is supported by experimental measurements (Simpson et al. 2013). We use a hexagonal lattice, with no more than one agent per site. The lattice spacing,  $\Delta$ , is chosen to be equal to the mean cell diameter (Jin et al., 2016b). This means we have a circular packing of agents, which corresponds to the maximum carrying capacity for a population of uniformly sized discs. The relationship between the scaled density,  $C(t)$ , and the number of agents,  $N(t)$ , is

$$C(t) = \frac{N(t)}{N_{\max}}, \quad (4)$$

so that  $C(t) = 1$  corresponds to the carrying capacity of  $N_{\max}$  agents, which is the number of lattice sites. Motivated by the experimental images of the cell proliferation assay in Fig ??(a)-(c), that is conducted with 3T3 fibroblast cells, we set  $\Delta = 25 \mu\text{m}$  to be the mean cell diameter (Simpson et al., 2013). As the images in Fig ??(a)-(c) show a fixed field of view that is much smaller than the spatial extent of the uniformly distributed cells in the experiment, we apply zero net flux boundary conditions (Johnston et al., 2015).

Each lattice site, indexed  $(i, j)$  where  $i, j \in \mathbb{Z}^+$ , has position

$$(x, y) = \begin{cases} (i\Delta, j\Delta\sqrt{3}/2) & \text{if } j \text{ is even,} \\ ((i + 1/2)\Delta, j\Delta\sqrt{3}/2) & \text{if } j \text{ is odd,} \end{cases}$$

such that  $1 \leq i \leq I$  and  $1 \leq j \leq J$ . To match a typical physical domain, such as the experiment in Fig ??(a)-(c) where the field of view is  $625 \mu\text{m} \times 480 \mu\text{m}$  and the cell diameter is  $\Delta = 25 \mu\text{m}$ , we set  $I = 25$  and  $J = 22$ . When this domain is packed to confluence, the field of view can hold no more than  $N_{\max} = 550$  agents.



In any single realisation of the discrete model, the occupancy of site  $\mathbf{s}$  is denoted  $C_{\mathbf{s}}$ , with  $C_{\mathbf{s}} = 1$  if the site is occupied, and  $C_{\mathbf{s}} = 0$  if vacant. We report results from the model by summing the total number of agents at time  $t$ , which we denote  $N(t)$ . Each site  $\mathbf{s}$  is associated with a unique index  $(i, j)$ . We denote the set of nearest neighbour sites surrounding site  $\mathbf{s}$  as  $\mathcal{N}\{\mathbf{s}\}$ , and the size of  $\mathcal{N}\{\mathbf{s}\}$  is  $|\mathcal{N}\{\mathbf{s}\}|$ . For a typical lattice site, not on any boundary,  $\mathcal{N}\{\mathbf{s}\}$  corresponds to the usual six nearest neighbour sites and  $|\mathcal{N}\{\mathbf{s}\}| = 6$ . However, for any lattice site on a boundary, we adjust  $\mathcal{N}\{\mathbf{s}\}$  and  $|\mathcal{N}\{\mathbf{s}\}|$  as appropriate to enforce no-flux boundary conditions.

To initiate simulations of a cell proliferation assay, we randomly select a lattice site and place an agent on that site, provided the site is vacant. We repeat this process until  $N(0) = 55$  agents have been randomly placed. This corresponds to each simulation starting with  $C(0) = 0.1$ , which is typical of the initial density, such as in Fig ??(a). The following algorithm is used to simulate the way in which cells migrate and proliferate during the experiment. At any time,  $t$ , there are  $N(t)$  agents on the lattice. In each discrete time step, of duration  $\tau$ , we allow motility and proliferation events to occur in the following two sequential steps.

First,  $N(t)$  agents are selected independently at random, one at a time with replacement, and given the opportunity to move with probability  $P_m \in [0, 1]$ . A motile agent attempts to move to one of the six nearest neighbour sites, selected at random. To simulate crowding effects, potential motility events are aborted if an agent attempts to move to an occupied site or attempts to move outside the domain.

Second, another  $N(t)$  agents are selected independently, at random, one at a time with replacement, and given the opportunity to proliferate with probability  $P_p \in [0, 1]$ . To assess how crowding affects the ability of a cell to proliferate, we follow the approach of Jin et al. (2016b) and assume that an

agent at site  $\mathbf{s}$  senses the occupancy of the six nearest neighbour sites, and  
can detect a measure of the average occupancy of those sites,

$$\bar{C}_{\mathbf{s}} = \frac{1}{|\mathcal{N}(\mathbf{s})|} \sum_{\mathbf{s}' \in \mathcal{N}\{\mathbf{s}\}} C_{\mathbf{s}'}. \quad (5)$$

This means that  $\bar{C}_{\mathbf{s}} \in [0, 1]$  is a measure of the local crowdedness in  $\mathcal{N}(\mathbf{s})$ .  
We use  $\bar{C}_{\mathbf{s}}$  to determine whether a potential proliferation event succeeds by  
introducing a *crowding function*,  $f(C) \in [0, 1]$  with  $f(0) = 1$  and  $f(1) = 0$ .  
To incorporate crowding effects we sample a random number,  $R \sim U(0, 1)$ . If  
 $R < f(\bar{C}_{\mathbf{s}})$ , a daughter agent is placed at a randomly chosen, vacant, nearest  
neighbouring site, whereas if  $R > f(\bar{C}_{\mathbf{s}})$ , the potential proliferation event is  
aborted. After the  $N(t)$  potential proliferation events have been attempted,  
 $N(t + \tau)$  is updated.

These two steps are repeated until the desired end time,  $T$ , is reached.

As previously demonstrated (Jin et al., 2016b), the continuum limit de-  
scription of this discrete model gives rise to

$$\frac{\partial C(x, y, t)}{\partial t} = D \left( \frac{\partial^2 C(x, y, t)}{\partial x^2} + \frac{\partial^2 C(x, y, t)}{\partial y^2} \right) + \lambda C(x, y, t) f(C), \quad (6)$$

where,

$$\lambda = \lim_{\Delta, \tau \rightarrow 0} \frac{P_p}{\tau}, \quad (7)$$

$$D = \lim_{\Delta, \tau \rightarrow 0} \frac{P_m \Delta^2}{4\tau}. \quad (8)$$

Here,  $\lambda$  is the proliferation rate, and the motility of agents is characterised by  
a diffusivity,  $D$ . Since the agents are initially distributed uniformly we have  
 $\partial C(x, y, t)/\partial x \approx \partial C(x, y, t)/\partial y \approx 0$ . This means that the partial differential

equation simplifies to an ordinary differential equation,

$$\frac{dC(t)}{dt} = \lambda C(t)f(C), \quad (9)$$

which is a generalised logistic growth model.

In this study, we only ever vary the parameters in the crowding function,  $\alpha$  and  $\beta$ . All other parameters are fixed, and chosen to represent a typical cell population. As previously stated, we set  $N(0) = 55$ ,  $I = 25$  and  $J = 22$ , to accommodate the typical geometry and initial condition of a cell proliferation assay with a population of cells whose mean diameter is  $\Delta = 25 \mu\text{m}$  (Simpson et al., 2013). To describe the rate at which cells move, we set  $P_m = 0.579$  and  $\tau = 0.0417$  hours. This corresponds to  $D = 2200 \mu\text{m}^2/\text{hour}$ , which is a typical value of the cell diffusivity for a mesenchymal cell line (Simpson et al., 2014). To describe the rate at which cells proliferate, we set  $P_p = 0.002$  and  $\tau = 0.0417$  hours. This corresponds to  $\lambda = 0.048$  /hour, which is a typical value of the cell proliferation rate (Treloar et al., 2014). This proliferation rate is consistent with the experimental data in Fig ??(d).

Using these parameter estimates, we show the evolution of  $C(t)$  for a single realisation of the discrete model, for each choice of crowding function, in Fig ??(a)-(b), for  $T = 24$  and 96 hours, respectively. Results in Fig ??(a)-(b) show some stochastic fluctuations, as expected. To approximate the expected behaviour, we perform 20 identically prepared realisations of the discrete model and show the mean density profile,  $\hat{C}(t)$ , in Fig ??(c)-(d), for  $T = 24$  and 96 hours, respectively. Comparing the single realisations with the mean behaviour confirms that there are minimal fluctuations, at this scale. Furthermore, we see minimal differences in the overall behaviour of the model when we consider a single realisation and the results from an ensemble of 20 identically prepared realisations.

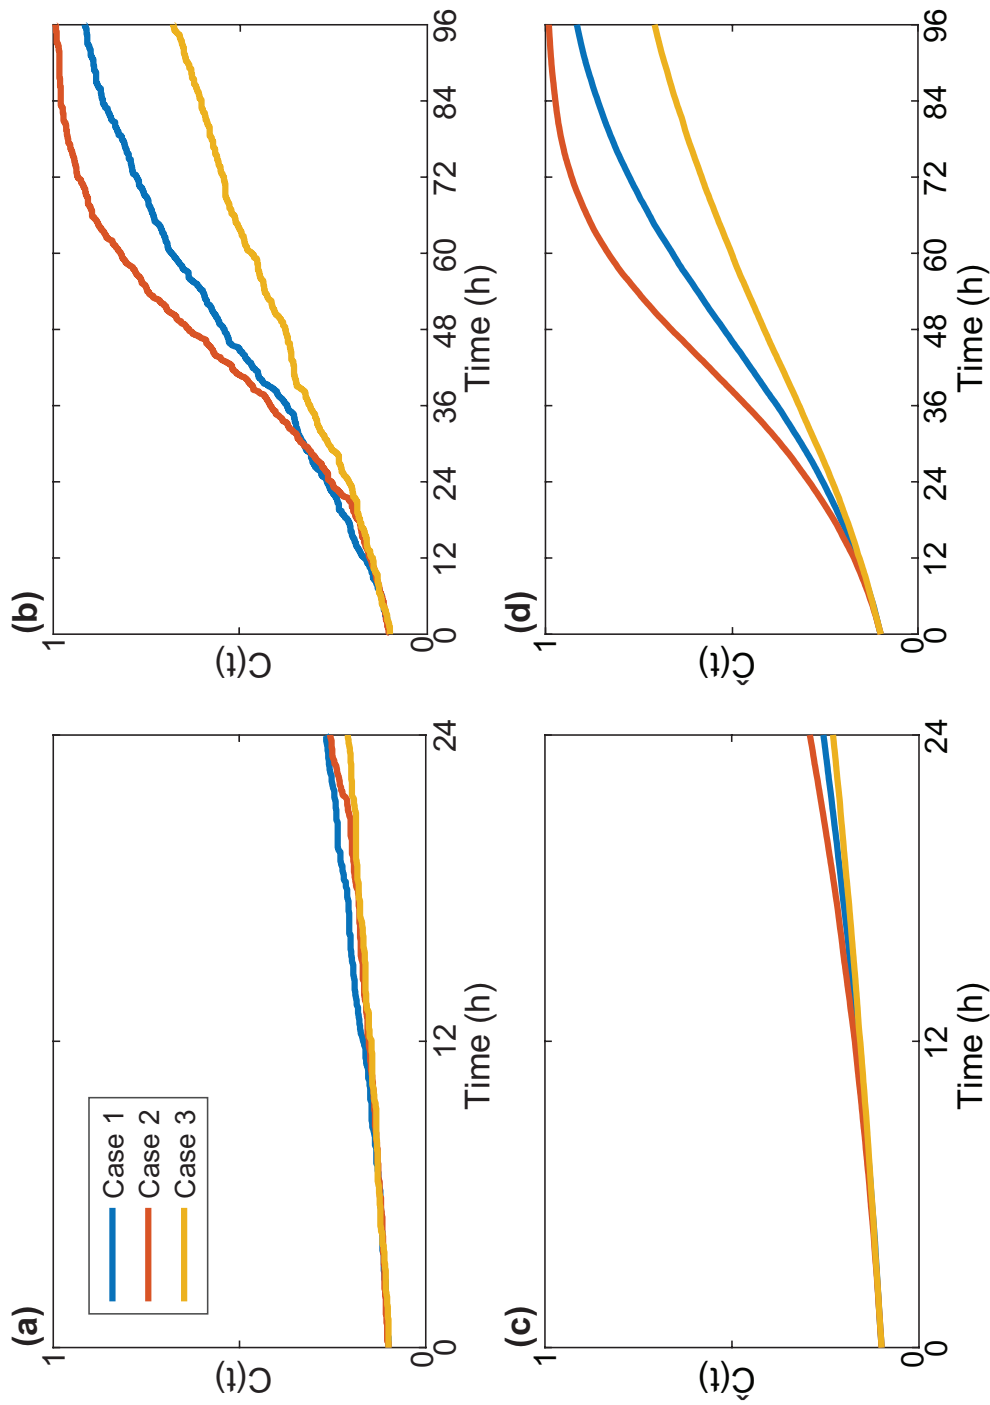

**Fig. 2. The role of the crowding function and timing for a typical proliferation assay.** Results show the evolution of: (a)  $C(t)$ , for  $T = 24$  hours; (b)  $C(t)$ , for  $T = 96$  hours; (c)  $\hat{C}(t)$ , for  $T = 24$  hours; and, (d)  $\hat{C}(t)$ , for  $T = 96$  hours. All simulations correspond to  $N(0) = 55$ ,  $I = 25$ ,  $J = 22$ ,  $P_m = 0.579$ ,  $P_p = 0.002$ ,  $\tau = 0.0417$  hours and  $\Delta = 25 \mu\text{m}$ . These discrete parameters correspond to  $\lambda = 0.048$  /hour and  $D = 2200 \mu\text{m}^2$ /hour. The carrying capacity is  $N_{\text{max}} = 550$ .

## 2.2 Parameter estimation using ABC rejection

Using a Bayesian framework, we consider the crowding function parameters  $\theta = (\alpha, \beta)$  as random variables, and the uncertainty in the  $\theta$  is updated using observed data (Gelman et al., 2004; Tanaka et al., 2006; Sunnaker et al., 2013; Collis et al., 2017). Under this assumption, we note that the cell density profile,  $C(t)$ , is also a random variable. In this section we refer to the variables using vector notation to keep the description of the inference algorithm as succinct as possible. However, in the main text we refer to the variables using ordered pairs,  $(\alpha, \beta)$ , so that our results are presented as clearly as possible.

To begin with, we perform three *in silico* experiments with fixed, known parameter values, which we refer to as the target parameters,  $\theta_*$ , corresponding to each Case considered. We take care to ensure that the three *in silico* experiments lead to typical  $C(t)$  data, as we demonstrate in Fig ???. The data from these experiments is treated as *observed* data, denoted  $\mathbf{X}_{\text{obs}}$ . Then, we use an ABC approach to explore, and quantify, how well the target values of  $\theta$  can be estimated using the observed data. In particular, we are interested in the effect of varying the duration over which the observation data is collected,  $T$ .

In the absence of any experimental observations, information about  $\theta$  is characterised by a specified prior distribution (Gelman et al., 2004, Sunnaker et al., 2013). For our choices of  $\alpha$  and  $\beta$ , we set the prior to be

$$\pi(\theta) = \frac{1}{9}, \quad \theta \in (0, 3) \times (0, 3), \quad (10)$$

which is a uniform distribution across  $(\alpha, \beta) \in (0, 3) \times (0, 3)$ .

We summarise data,  $\mathbf{X}$ , with a lower-dimensional summary statistic,  $S$ . Under a Bayesian framework, the information from the prior is updated by the likelihood of the observations,  $p(S_{\text{obs}}|\theta)$ , to produce posterior distributions,

$p(\boldsymbol{\theta}|S_{\text{obs}})$ , of  $\boldsymbol{\theta}$ . In this study, we use the most fundamental ABC algorithm, known as ABC rejection (Liepe et al. 2014; Tanaka et al., 2006; Sunnaker et al., 2013). Our aim is to quantify the trade off between the duration of the experiment,  $T$ , and the reduction in uncertainty of the value of  $\boldsymbol{\theta}$  as well as the information gain.

In this work, we choose  $S$  to be the number of agents observed at equally spaced intervals of 24 hours. Let  $N_{\text{obs}}(t)$  and  $N_{\text{sim}}(t)$  denote the number of agents present in the observed data and a simulated cell proliferation assay at time  $t$ , respectively. We choose a discrepancy measure,  $\rho(S_{\text{obs}}, S_{\text{sim}})$ , to be the cumulative sum of the square difference between  $N_{\text{sim}}(t)$  and  $N_{\text{obs}}(t)$  at each 24 hour interval, up to the duration of the experiment,  $T$ , such that

$$\rho(S_{\text{obs}}, S_{\text{sim}}) = \sum_{i=1}^{T/24} [N_{\text{sim}}(24i) - N_{\text{obs}}(24i)]^2. \quad (11)$$

With these definitions, the ABC rejection algorithm is given by Algorithm 1.

---

**Algorithm 1** ABC rejection sampling

---

- 1: Set  $P_m = 0.579$ ,  $P_p = 0.002$ ,  $\Delta = 25 \mu\text{m}$ ,  $\tau = 0.0417$  hours,  $N(0) = 55$ .
  - 2: Draw  $\boldsymbol{\theta}_i \sim \pi(\boldsymbol{\theta})$ .
  - 3: Simulate cell proliferation assay with  $\boldsymbol{\theta}_i$ .
  - 4: Record  $S_{\text{sim}_i} = \{N_{\text{sim}}(24j)\}$ ,  $j = 1, 2, 3, 4$ .
  - 5: Compute  $\epsilon_i = \rho(S_{\text{obs}}, S_{\text{sim}_i})$ , given in Eq ??.
  - 6: Repeat steps 2-5 until  $10^6$  samples  $\{\boldsymbol{\theta}_i, \epsilon_i\}_{i=1}^{10^6}$  are simulated.
  - 7: Retain a small proportion,  $u = 0.01$ , with the smallest discrepancy,  $\epsilon_i$ , as posterior samples.
- 

To present and perform calculations with posterior distributions, we use a kernel density estimate with grid spacing 0.01 to form an approximate continuous posterior distribution from the samples. We do this using the `ksdensity` function in the MATLAB Statistics Toolbox (Mathworks, 2017). All ABC posterior results presented in the main paper correspond to retaining the 10,000

simulations out of 1,000,000 simulations with the smallest discrepancy, giving 250  
 $u = 0.01$ . To confirm that our results are insensitive to this choice of  $u$  we 251  
also present equivalent results with  $u = 0.02$  in the Supplementary Material 252  
document. 253

### 2.2.1 Kullback-Leibler divergence 254

To quantitatively compare posterior distributions, we calculate the Kullback- 255  
Leibler (KL) divergence (Kullback and Leibler 1951; Burnham and Anderson 256  
2002),  $D_{KL}(p||\pi)$ , for each posterior distribution. The KL divergence is a mea- 257  
sure of the information gain in moving from the prior,  $\pi(\boldsymbol{\theta})$ , to the posterior, 258  
 $p(\boldsymbol{\theta}|S_{\text{obs}})$ , in Bayesian inference, and is defined as 259

$$D_{KL}(p(\boldsymbol{\theta}|S_{\text{obs}})||\pi(\boldsymbol{\theta})) = \iint_{\Theta} p(\boldsymbol{\theta}|S_{\text{obs}}) \log \left( \frac{p(\boldsymbol{\theta}|S_{\text{obs}})}{\pi(\boldsymbol{\theta})} \right) d\boldsymbol{\theta}, \quad (12)$$

where  $\Theta = (0, 3) \times (0, 3)$  is the prior support. To calculate  $D_{KL}(p(\boldsymbol{\theta}|S_{\text{obs}})||\pi(\boldsymbol{\theta}))$  260  
we use quadrature to estimate the integral in Eq (??), taking care to ensure 261  
that the result is independent of the discretisation. Note that  $D_{KL}$  is a measure 262  
of the amount of information gained when moving from the prior distribution 263  
to the posterior distribution. 264

### 2.2.2 Other measures 265

We also make use of several other measures to help quantify various properties 266  
of the posterior densities. For each Case we always know, in advance, the target 267  
parameter values,  $\boldsymbol{\theta}_*$ , and we also estimate the mode,  $\boldsymbol{\theta}_m$ , using the kernel 268  
density estimate. Note that the mode is the value of  $\boldsymbol{\theta}$  corresponding to the 269  
maximum posterior density, 270

$$\boldsymbol{\theta}_m = \underset{\boldsymbol{\theta}}{\operatorname{argmax}} p(\boldsymbol{\theta}|S_{\text{obs}}). \quad (13)$$

It is useful to report the posterior density at the target,  $p(\boldsymbol{\theta}_*|S_{\text{obs}})$ , for various 271  
values of  $T$ . It is also instructive to report the posterior density at the mode, 272  
 $p(\boldsymbol{\theta}_m|S_{\text{obs}})$ , for various values of  $T$ . Another useful measure is the Euclidean 273  
distance between the target and the mode, given by 274

$$d = \|\boldsymbol{\theta}_* - \boldsymbol{\theta}_m\|_2. \quad (14)$$

### 3 Results and Discussion 275

Results from a typical cell proliferation assay are shown in Fig ??(a)-(c). The 276  
cell density profile, shown in Fig ??(d), increases approximately linearly with 277  
time. This indicates that the experimental duration is not long enough for us 278  
to observe crowding effects, which occur at higher densities, and cause the net 279  
growth rate to reduce so that cell density profile,  $C(t)$ , becomes concave down 280  
at later times. Therefore, by using typical experimental data, it is unclear 281  
whether the growth process follows a classical logistic model, or some other 282  
more general growth model. 283

To provide further insight into the limitations of this standard experimen- 284  
tal design, we show results from the discrete model in Fig ??(a) for a standard 285  
experimental duration of  $T = 24$  hours, for three different crowding functions. 286  
These results show several interesting features: (i) the cell density profile for 287  
each Case appears to increase linearly with time, which is similar to the exper- 288  
imental results in Fig ??(d); (ii) it is difficult to distinguish between the three 289  
different profiles, despite each profile corresponding to a different crowding 290  
function; and (iii) comparing the cell density profiles of a single realisation in 291  
Fig ??(a) to the expected behaviour in Fig ??(c) confirms that the expected 292  
cell density profiles for each Case are similar for the first 24 hours. 293



To examine when crowding effects begin to significantly influence the cell density profile, we perform simulations over longer durations of time. In particular, we examine  $T \leq 96$  hours. Results for a single realisation in Fig ??(b) show that the cell density profiles for each Case are indistinguishable during the first 24 hours. However the profile for each Case does become increasingly distinguishable at times greater than 24 hours. For example, each Case is clearly discernable by 72 hours. Comparing the cell density profiles of a single realisation in Fig ??(b) to the expected behaviour in Fig ??(d) confirms that each Case is only distinguishable at times greater than 24 hours. These observations motivate several questions that we will explore. The two main questions we focus on are: (i) what experimental duration is required to reliably distinguish between Cases 1, 2 and 3; and, (ii) can we quantify the trade off between allowing the experiment to run for a sufficiently long period of time to distinguish between the Cases, while still minimising the duration of the experiment.

To quantify the increase in information we can obtain by running the experiment for longer durations of time, we attempt to recover the parameters in the crowding function for each Case using ABC to produce a posterior distribution for  $\alpha$  and  $\beta$ , which we refer to as the ordered pair  $(\alpha, \beta)$ . To achieve this aim, we produce *in silico* observed data, using a target parameter set for each Case: Case 1 corresponds to  $(\alpha, \beta) = (1, 1)$ ; Case 2 corresponds to  $(\alpha, \beta) = (2, 1)$ ; and Case 3 corresponds to  $(\alpha, \beta) = (1, 2)$ . All other parameters in the simulations are held fixed at the values given previously.

The data we use to perform inference takes the form of the size of the population,  $N(t)$ , recorded at equally spaced intervals, each of duration 24 hours. In particular, we examine the effect of varying the total duration of the experiment,  $T$ . This means that if we consider an experimental design with  $T = 24$  hours, then we record  $N(24)$  only. In contrast, if we consider an

experimental design with  $T = 72$  hours, we record  $N(24)$ ,  $N(48)$  and  $N(72)$ . 322

Overall, we examine four durations,  $T = 24, 48, 72$  and  $96$  hours. 323

Results in Fig ??(a)-(d) show the bivariate posterior distributions of  $\alpha$  and 324  
 $\beta$  for Case 1, with  $T = 24, 48, 72$  and  $96$  hours, respectively. Recall that the 325  
target parameters for Case 1 are  $(\alpha, \beta) = (1, 1)$ . The results indicate that the 326  
choice of prior,  $\pi(\theta)$ , on the domain  $(0, 3) \times (0, 3)$ , is reasonable because the 327  
posterior distribution has full support within this region. The distribution in 328  
Fig ??(a) shows there are many parameter combinations that are likely to 329  
match the observed data, with  $T = 24$  hours. This observation is consistent 330  
with the results in Fig ??(a) where we observe that setting  $T = 24$  hours is 331  
insufficient to distinguish between the three Cases. Comparing the posterior 332  
distributions in Fig ??(a)-(d), we see that increasing  $T$  leads to a narrowing of 333  
the posterior distribution, and the mode of the distribution moves toward the 334  
target parameter combination. For this Case, we see the largest benefit when 335  
increasing  $T$  from 48 to 72 hours. For example, for  $T = 48$  hours, the mode of 336  
the distribution is  $(1.82, 2.16)$ , which means that each parameter estimate is 337  
almost double each target value. In contrast, the mode of the distribution at 338  
 $T = 72$  hours is  $(1.06, 0.95)$ , so each parameter is able to be estimated within 339  
6% of the target. 340

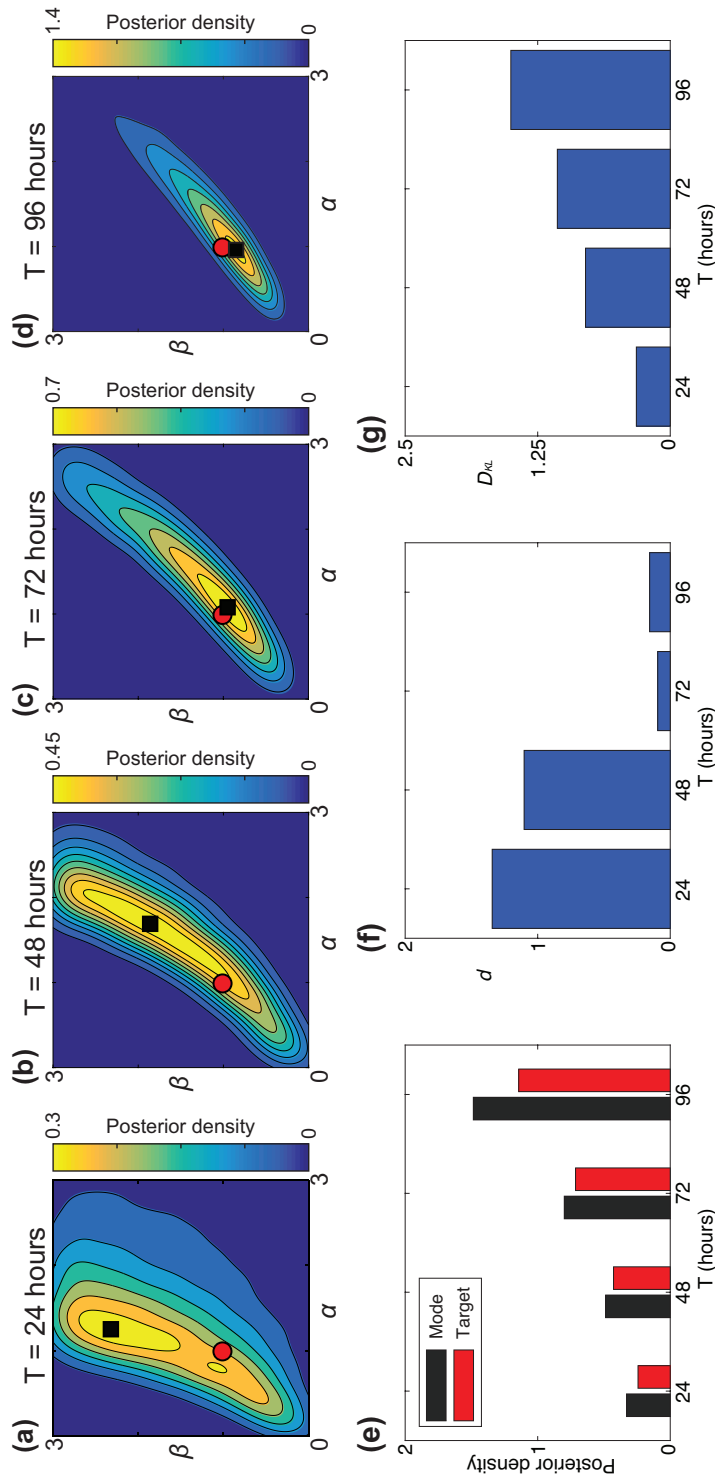

**Fig. 3. Posterior distributions for Case 1:  $(\alpha, \beta) = (1, 1)$ .** (a)-(d) ABC posterior distributions for: (a)  $T = 24$  hours; (b)  $T = 48$  hours; (c)  $T = 72$  hours and (d)  $T = 96$  hours. The posterior distributions are approximated using the best 10,000 samples from 1,000,000 prior samples ( $u = 0.01$ ), as measured by Eq ???. The black squares show the location of the posterior target parameters used to generate the observed data ( $\alpha = 1, \beta = 1$ ). The red circles show the location of the posterior distribution. The modes are (1.32, 2.43), (1.82, 2.16), (1.06, 0.95) and (0.96, 0.86) in (a)-(d), respectively. (e)-(g) Show measures of accuracy and precision. (e) Quantitatively compares the posterior density at the mode and the target parameter values. (f) Shows  $d$ , the Euclidean distance between the mode and target parameter values, given by Eq ???. (g) Shows  $D_{KL}$ , the Kullback-Leibler divergence from the prior, for each posterior distribution, given by Eq ???.

To quantify the properties in the posterior distributions, Fig ??(a)-(d), 341  
there are many features that we may consider. Figure ??(e) compares the 342  
posterior density at the target parameter values and the maximum posterior 343  
density of the distribution, which corresponds to the mode. The maximum 344  
posterior density increases with  $T$ , confirming that the posterior distribution 345  
narrows as the duration of the experiment is increased. Results in Figure 346  
??(f) show that  $d$  eventually decreases with  $T$ , indicating that the mode of the 347  
distribution moves towards the target as  $T$  increases. Together, these results 348  
show that the density at the mode is close to the density at the target, and that 349  
both these quantities increase with  $T$ . This indicates that the target parameter 350  
combination is always as likely as the mode. Results in Fig ??(g) shows how 351  
the KL divergence (Eq ??) also increases with  $T$ . We see that the largest 352  
gain in information for this Case occurs when  $T$  is increased from 24 hours 353  
( $D_{KL} = 0.33$ ) to 48 hours ( $D_{KL} = 0.84$ ). The quantitative measures in Fig 354  
??(e)-(g) suggest that there is always value in increasing  $T$ , however the value 355  
of increasing  $T$  varies. For example, there is a substantial benefit in extending 356  
the experiment from  $T = 48$  to 72 hours, whereas the benefit in extending the 357  
experiment from  $T = 72$  to 96 hours is less pronounced. 358

Results in Fig ??(a)-(d) and Fig ??(a)-(d) show the bivariate posterior 359  
distributions of  $\alpha$  and  $\beta$  for Cases 2 and 3, respectively. Note that all data 360  
presented for Cases 2 and 3 is given in the same format as used for the results 361  
corresponding to Case 1 in Fig ??. As before, we always observe a narrowing 362  
of the posterior distribution as  $T$  increases. Results in Fig ??(e) and Fig ??(e) 363  
clearly show that the target parameter combination becomes more likely as 364  
 $T$  is increased. Data for  $d$  in Fig ??(f) confirms that the distance between 365  
the target and the mode is reduced for larger values of  $T$ . Data for  $d$  in Fig 366  
??(f) shows that the distance between the target and the mode increases, at 367  
first, when  $T$  is increased from 24 to 48 hours. However, the most important 368

---

feature is that  $d$  always decreases eventually for large enough  $T$ . Again, as  $T$  369  
is increased,  $D_{KL}$  increases in both Fig ??(g) and Fig ??(g). 370

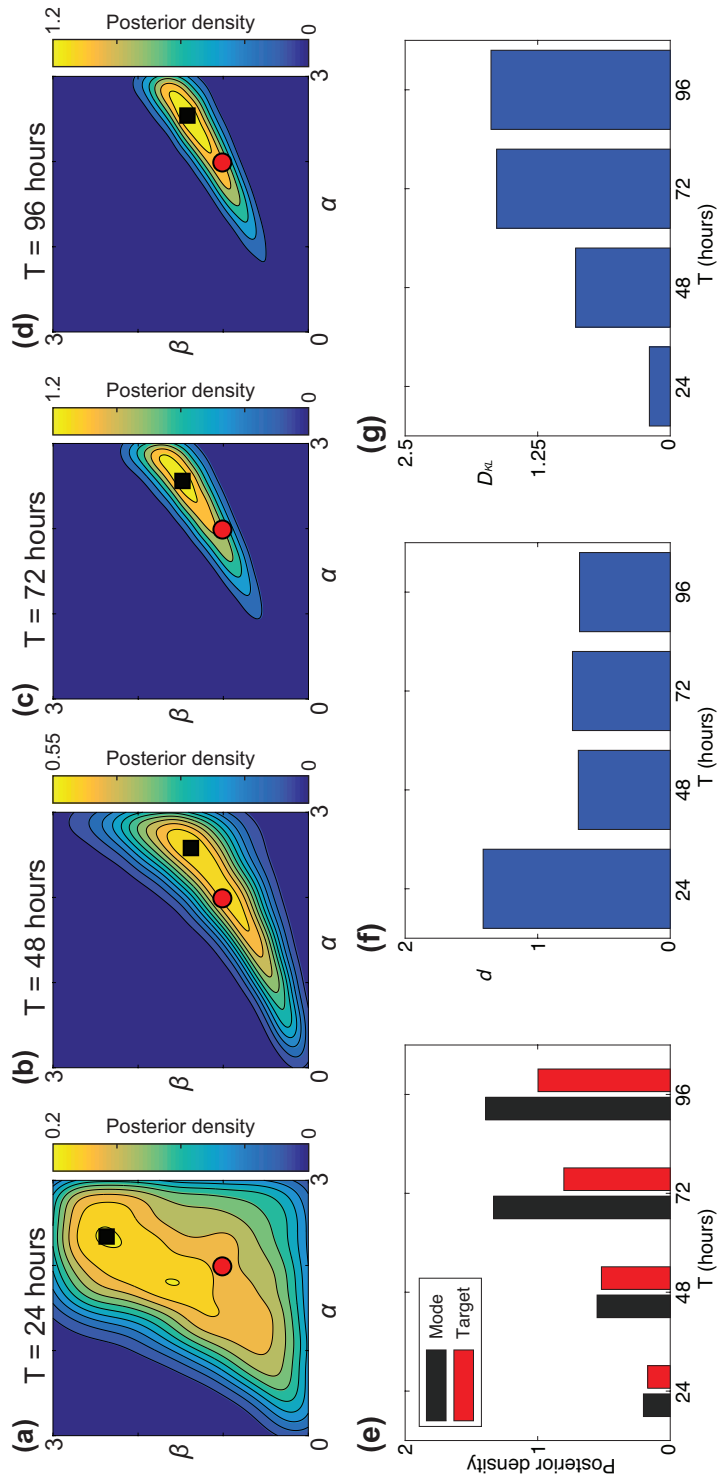

**Fig. 4. Posterior distributions for Case 2:  $(\alpha, \beta) = (2, 1)$ .** (a)-(d) ABC posterior distributions for: (a)  $T = 24$  hours; (b)  $T = 48$  hours; (c)  $T = 72$  hours and (d)  $T = 96$  hours. The posterior distributions are approximated using the best 10,000 samples from 1,000,000 prior samples ( $u = 0.01$ ), as measured by Eq ???. The red circles show the location of the posterior target parameters used to generate the observed data ( $\alpha = 2, \beta = 1$ ). The black squares indicate the mode of the posterior distribution. The modes are (1.89, 1.81), (2.55, 1.38), (2.54, 1.46) and (2.53, 1.41) in (a)-(d), respectively. (e)-(g) Show measures of accuracy and precision. (e) Quantitatively compares the posterior density at the mode and the target parameter values. (f) Shows  $d$ , the Euclidean distance between the mode and target parameter values, given by Eq ???. (g) Shows  $D_{KL}$ , the Kullback-Leibler divergence from the prior, for each posterior distribution, given by Eq ???.

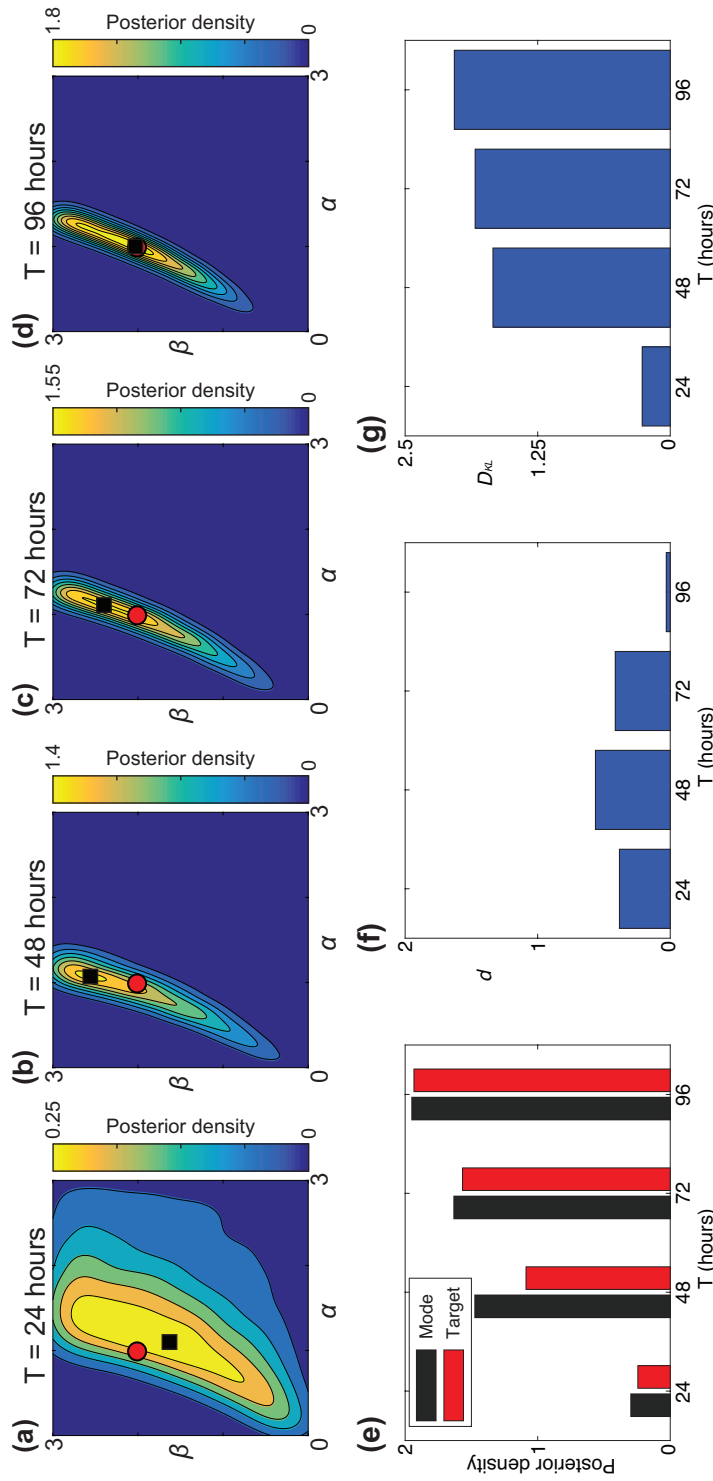

**Fig. 5. Posterior distributions for Case 3:  $(\alpha, \beta) = (1, 2)$ .** (a)-(d) ABC posterior distributions for: (a)  $T = 24$  hours; (b)  $T = 48$  hours; (c)  $T = 72$  hours and (d)  $T = 96$  hours. The posterior distributions are approximated using the best 10,000 samples from 1,000,000 prior samples ( $u = 0.01$ ), as measured by Eq ???. The red circles show the location of the posterior target parameters used to generate the observed data ( $\alpha = 1, \beta = 2$ ). The black squares indicate the mode of the posterior distribution. The modes are (1.13, 1.70), (1.09, 2.57), (1.20, 2.67) and (1.03, 2.11) in (a)-(d), respectively. (e)-(g) Show measures of accuracy and precision. (e) Quantitatively compares the posterior density at the mode and the target parameter values. (f) Shows  $d$ , the Euclidean distance between the mode and target parameter values, given by Eq ???. (g) Shows  $D_{KL}$ , the Kullback-Leibler divergence from the prior, for each posterior distribution, given by Eq ???.

Overall, the essential trends in Fig ?? and Fig ?? are consistent with those 371  
in Fig ??, namely: (i) the standard choice of  $T = 24$  hours is insufficient to 372  
determine the parameters in the crowding function and hence it is impossible to 373  
reliably distinguish between classical logistic growth and more general logistic 374  
growth models; and, (ii) as the value of  $T$  is increased, our ability to recover the 375  
parameters in the crowding function increases. However, certain details differ 376  
between the cases. For example, choosing  $T = 72$  hours allows us to recover 377  
estimates of  $\alpha$  and  $\beta$  to an accuracy of at least 6, 46 and 34% in Cases 1, 2 378  
and 3, respectively. Therefore, with this choice of  $T$  we are able to recover the 379  
parameters for Case 1 relatively accurately. In contrast, if we choose  $T = 96$  380  
hours, we recover estimates of  $\alpha$  and  $\beta$  to an accuracy of at least 14, 41 and 381  
6% in Cases 1, 2 and 3, respectively. Therefore, with this choice of  $T$  we are 382  
able to recover the parameters for Cases 1 and 3 relatively accurately, yet Case 383  
2 remains relatively unclear. 384

#### 4 Conclusion 385

In this work, we implement a random walk model to simulate a cell prolifera- 386  
tion assay. In particular, we focus on exploring whether the typical experimen- 387  
tal design of a cell proliferation assay, with  $C(0) \approx 0.1$ ,  $\lambda \approx 0.05$  /hour and 388  
 $T = 24$  hours, is sufficient to make a clear distinction between classical logistic 389  
growth and more general logistic growth models. We are motivated to explore 390  
this question because many theoretical modelling studies choose to represent 391  
cell proliferation with the classical logistic model, yet this assumption is rarely 392  
tested using experimental data. Furthermore, there is a growing awareness in 393  
the mathematical biology literature that the choice of using a classical logistic 394  
model can be inappropriate. For example, Sarapata and de Pillis (2014) show 395  
that a range of tumour growth data is more accurately predicted using a gen- 396



eralised logistic model rather than the classical logistic model. Therefore, the question of whether standard designs of cell proliferation assays can make a clear and unambiguous distinction between classical logistic growth and more general logistic growth is important as cell proliferation assays are commonly employed. It is currently unclear whether the standard experimental design is sufficient to distinguish between different sigmoid growth mechanisms. This study is the first time that a stochastic individual based model has been used to explore the optimal duration of a cell proliferation assay. In particular, we explore how to choose the duration of the assay to reliably distinguish between different types of growth models.

One of the main conclusions of our study is that the typical experimental design for a cell proliferation assay, with  $C(0) \approx 0.1$ ,  $\lambda \approx 0.05$  /hour and  $T = 24$  hours, can not be used to make a distinction between classical logistic growth and more general logistic growth. Further, we use our stochastic modelling and parameter inference tools to explore how the experimental design can be altered so that this distinction can be made with confidence. In particular we explore the option of increasing the duration of the experiment,  $T$ . Our parameter inference results show that increasing  $T$  always provides more information about the crowding function parameters. However, the trends are subtle, and there is no simple guideline for prescribing the ideal experimental duration that one could implement in practice. Our results show that we can recover the crowding function for the case of classical logistic growth (Case 1:  $\alpha = 1$ ,  $\beta = 1$ ) to within an accuracy of 6% if the experimental duration is increased to  $T = 72$  hours. Beyond this duration, we encounter diminishing returns for this Case. For example, further increasing the duration of the experiment to  $T = 96$  hours leads to only a small increase in additional information about the crowding function. In other cases where we consider generalised logistic growth (Case 2:  $\alpha = 1$ ,  $\beta = 2$ ), we see that the parameter

estimates remain relatively poor, even if the experimental duration is increased 425  
to  $T = 72$  hours. For Case 2 we recover the parameters to an accuracy of within 426  
33% if  $T = 72$  hours, and to within 5% if  $T = 96$  hours. Therefore, it is not 427  
possible to make a simple conclusion that cell proliferation assays ought to 428  
be conducted until  $T = 48$  or  $T = 72$  hours since the increase in information 429  
with  $T$  is subtle. Despite this complication, our results certainly show that the 430  
standard choice of  $T = 24$  hours is insufficient, and that the experiment ought 431  
to be conducted for as long as practically possible. 432

One aspect of a cell proliferation assay that we have not explored is the 433  
dependence of the results on the initial cell density,  $C(0)$ . All results in this 434  
work, both the *in vitro* experimental data in Fig ??, and the *in silico* data in 435  
Figs ??-??, deal with initial densities of  $C(0) \approx 0.1$ , where  $C = 1$  corresponds 436  
to the maximum carrying capacity of the confluent monolayer. This initial 437  
density corresponds to a fairly standard choice of initiating a cell proliferation 438  
assay with approximately 20,000 cells placed into the wells of a 24-well tissue 439  
culture plate where each well has a diameter of approximately 15 mm. Alterna- 440  
tively, a similar initial density can be obtained by initiating a cell proliferation 441  
assay with approximately 10,000 cells placed into the wells of a 96-well tissue 442  
culture plate, where each well has a diameter of approximately 9 mm. While 443  
it is true that crowding effects in a cell proliferation assay might be more 444  
clearly discernable by initiating the experiment with larger numbers of cells, 445  
we warn against this for two reasons. First, from a practical point of view, our 446  
experience in initiating a two-dimensional *in vitro* cell biology assay with large 447  
numbers of cells is problematic as the cells can tend to cluster together, and 448  
pile up in the vertical direction instead of spreading as a monolayer (Treloar 449  
et al. 2013). Second, established methods for initiating cell proliferation assays 450  
with  $C(0) \approx 0.1$  are perfectly well suited to observe the low density exponen- 451  
tial phase of the growth process, which is important to estimate the intrinsic 452

proliferation rate,  $\lambda$ . For example, the data shown in Fig ??(a)-(c) corresponds 453  
to a cell proliferation assay initialised with 20,000 cells in a 24-well tissue cul- 454  
ture plate, and results in Fig ??(d) show  $C(t)$  grows linearly over the first 24 455  
hours. This result is consistent with the early part of the growth process where 456  
we expect  $C(t) \sim C(0)\exp(\lambda t) = C(0) [1 + \lambda t + \mathcal{O}(t^2)]$ . Therefore, we do not 457  
suggest that the standard experimental design for a cell proliferation assay 458  
ought to be altered by increasing  $C(0)$ . This is why, throughout this study, 459  
we have treated  $\lambda$  and  $C(0)$  as known, constant values, in the experimental 460  
design. 461

All of the results presented here have focused on exploring whether we can 462  
make a reliable distinction between classical logistic growth and more general 463  
logistic growth in a cell proliferation assay. To achieve this we use *in silico* sim- 464  
ulations in which the crowding function can be specified. While the discrete 465  
simulation algorithm can be used to model a cell proliferation assay with any 466  
crowding function,  $f(C)$ , to illustrate the key points of our study we focus on 467  
three particular cases. Case 1 corresponds to classical logistic growth, while 468  
Cases 2 and 3 are examples of more general logistic growth. Of course, the 469  
methods outlined in this work apply equally well to any other choice of crowd- 470  
ing function. Furthermore, while all crowding functions explored here involve 471  
two parameters,  $\alpha$  and  $\beta$ , it is possible that other choices of crowding function 472  
might contain additional parameters. Under these conditions, the procedures 473  
described here to quantitatively measure the potential for parameter recov- 474  
ery as a function of the experimental design apply in exactly the same way 475  
regardless of the number of unknown parameters in the crowding function. 476

## 5 Acknowledgments

477

This work is supported by the Australian Research Council (DP140100249, 478  
DP170100474). Computational resources were provided by the High Perfor- 479  
mance Computing and Research Support Group. We thank the two anony- 480  
mous referees for their helpful comments. 481

## References

1. Bosco DB, Kenworthy R, Zorio DAR, Sang Q-XA (2015) Human mesenchymal stem cells Are resistant to paclitaxel by adopting a non-proliferative fibroblastic state. *PLOS ONE*. 10: e0128511.
2. Bourseguin J et al. (2016) FANCD2 functions as a critical factor downstream of MiTF to maintain the proliferation and survival of melanoma cells. *Sci Rep*. 6: 36539.
3. Burnham KP, Anderson DR (2002) Model selection and multimodel inference: a practical information-theoretic approach. Springer, Berlin.
4. Cai AQ, Landman KA, Hughes BD (2007) Multi-scale modeling of a wound-healing cell migration assay. *J Theor Biol*. 245: 576-594.
5. Collis J, Connor AJ, Paczkowski M, Kannan P, Pitt-Francis J, Byrne HM, Hubbard ME (2017) Bayesian calibration, validation and uncertainty quantification for predictive modelling of tumour growth: a tutorial. *B Math Biol*. 79: 939-973.
6. Dale PD, Sherratt JA, Maini PK (1994) The speed of corneal epithelial wound healing. *Appl Math Lett*. 9: 11-14.
7. Deroulers C, Aubert M, Badoual M, Grammaticos B (2009) Modeling tumor cell migration: From microscopic to macroscopic models. *Phys Rev E*. 79: 031917.
8. Doran MR, Mills RJ, Parker AJ, Landman KA, Cooper-White JJ (2009) A cell migration device that maintains a defined surface with no cellular damage during wound edge generation. *Lab on a Chip*. 9: 2364-2369.
9. Edelstein-Keshet L (1988) Mathematical models in biology. Random House, New York.
10. Gelman A, Carlin JB, Stern HS, Rubin DB (2004) Bayesian data analysis. CRC Press, Florida.
11. Gerlee P (2013) The model muddle: in search of tumour growth laws. *Cancer Res*. 73: 2407-2411.
12. Jin W, Shah ET, Penington CP, McCue SW, Chopin LK, Simpson MJ (2016a) Reproducibility of scratch assays is affected by the initial degree of confluence: Experiments, modelling and model selection. *J Theor Biol*. 390: 136-145.
13. Jin W, Penington CJ, McCue SW, Simpson MJ (2016b) Stochastic simulation tools and continuum models for describing two-dimensional collective cell spreading with universal growth functions. *Phys Biol*. 13: 056003.
14. Jin W, Shah ET, Penington CJ, McCue SW, Maini PK, Simpson MJ (2017) Logistic proliferation of cells in scratch assays is delayed. *B Math Biol*. 79: 1028-1050.

15. Johnston ST, Shah ET, Chopin LK, McElwain DLS, Simpson MJ (2015) Estimating cell diffusivity and cell proliferation rate by interpreting IncuCyte ZOOM™ assay data using the Fisher-Kolmogorov model. *BMC Syst Biol.* 9: 38.
16. Kullback S, Leibler RA (1951) On information and sufficiency. *Ann Math Stat.* 22: 79-86.
17. Laird AK (1964) Dynamics of tumour growth. *Brit J Cancer.* 18: 490-502.
18. Liepe J, Kirk P, Filippi S, Toni T, Barnes CP, Stumpf MPH (2014) A framework for parameter estimation and model selection from experimental data in systems biology using approximate Bayesian computation. *Nat Protoc.* 9: 439-456.
19. Liang CC, Park AY, Guan J-L (2007) In vitro scratch assay: a convenient and inexpensive method for analysis of cell migration in vitro. *Nat Protoc.* 2: 329-333.
20. Liggett TM (1999) Stochastic interacting systems: contact, voter and exclusion processes. Springer, Berlin.
21. Maini PK, McElwain DLS, Leavesley DI (2004a) Traveling wave model to interpret a wound-healing cell migration assay for human peritoneal mesothelial cells. *Tissue Eng.* 10: 475-482.
22. Maini PK, McElwain DLS, Leavesley D (2004b) Travelling waves in a wound healing assay. *Appl Math Lett.* 17: 575-580.
23. Mathworks (2017) Kernel smoothing function estimate for univariate and bivariate data. Mathworks. <http://au.mathworks.com/help/stats/ksdensity.html>. Accessed June 2007.
24. Murray JD (2002) *Mathematical biology.* Springer, Berlin.
25. O'Dea RD, Byrne HM, Waters SL (2012) *Continuum modelling of in vitro tissue engineering: a review.* Springer, Berlin.
26. Pearl R (1927) The growth of populations. *Q Rev Biol.* 2: 532-548.
27. Sarapata EA, de Pillis LG (2014) A comparison and catalog of intrinsic tumor growth models. *B Math Biol.* 76: 2010-2024.
28. Savla U, Olson LE, Waters CM. (2004) Mathematical modeling of airway epithelial wound closure during cyclic mechanical strain. *J Appl Physiol.* 96: 566-574.
29. Sengers BG, Please CP, Oreffo ROC (2007) Experimental characterization and computational modelling of two-dimensional cell spreading for skeletal regeneration. *J R Soc Interface.* 4: 1107.
30. Shakeel M, Matthews PC, Graham RS, Waters SL (2013) A continuum model of cell proliferation and nutrient transport in a perfusion bioreactor. *Math Med Biol.* 30: 21-44.
31. Sheardown H, Cheng YL. (1996) Mechanisms of corneal epithelial wound healing. *Chem Eng Sci.* 51: 4517-4529.

32. Sherratt JA, Murray JD. (1990) Models of epidermal wound healing. *Proc R Soc Lond B*. 241: 29-36.
33. Simpson MJ, Treloar KK, Binder BJ, Haridas P, Manton KJ, Leavesley DI, McElwain DLS, Baker RE (2013) Quantifying the roles of cell motility and cell proliferation in a circular barrier assay. *J R Soc Interface*. 10: 20130007.
34. Sunnaker M, Busetto AG, Numminen E, Corander J, Foll M, Dessimoz C (2013) Approximate Bayesian Computation. *PLOS Comput Biol*. 9: e1002803.
35. Tanaka MM, Francis AR, Luciani F, Sisson SA (2006) Using approximate Bayesian computation to estimate tuberculosis transmission parameters from genotype data. *Genetics*. 173: 1511-1520.
36. Treloar KK, Simpson MJ, Haridas P, Manton KJ, Leavesley DI, McElwain DLS, Baker RE (2013) Multiple types of data are required to identify the mechanisms influencing the spatial expansion of melanoma cell colonies. *BMC Syst Biol*. 7: 137.
37. Treloar KK, Simpson MJ, McElwain DLS, Baker RE (2014) Are in vitro estimates of cell diffusivity and cell proliferation rate sensitive to assay geometry? *J Theor Biol*. 356: 71-84.
38. Tsoularis A, Wallace J (2002) Analysis of logistic growth models. *Math Biosci*. 179: 21-55.
39. Vo BN, Drovandi CC, Pettit AN, Simpson MJ (2015) Quantifying uncertainty in parameter estimates for stochastic models of collective cell spreading using approximate Bayesian computation. *Math Biosci*. 263: 133-142.
40. West GB, Brown JH, Enquist BJ (2001) A general model for ontogenetic growth. *Nature*. 413: 628-631.
41. Zwietering MH, Jongenburger I, Rombouts FM, van't Riet K (1990) Modeling of the bacterial growth curve. *Appl Environ Microb*. 56: 1875-1881.
